# Supplementary material for: Photon-counting detector CT-based virtual monoenergetic reconstructions: repeatability and reproducibility of radiomics features of an organic phantom and human myocardium
Source: PubMed Central journal article supplement (PMC10597903; doi:10.1186/s41747-023-00371-8), 2023-10-25
Supplement: 41747_2023_371_MOESM1_ESM.pdf [file 41747_2023_371_MOESM1_ESM.pdf]

Photon-counting detector CT-based virtual monoenergetic reconstructions: repeatability and reproducibility of radiomics features of an organic phantom and human myocardium

**ELECTRONIC SUPPLEMENTARY MATERIAL**

**Suppl. Figure 1:** Scatter plot of all 93 normalized radiomics features for the five repeated scans at 70 keV.

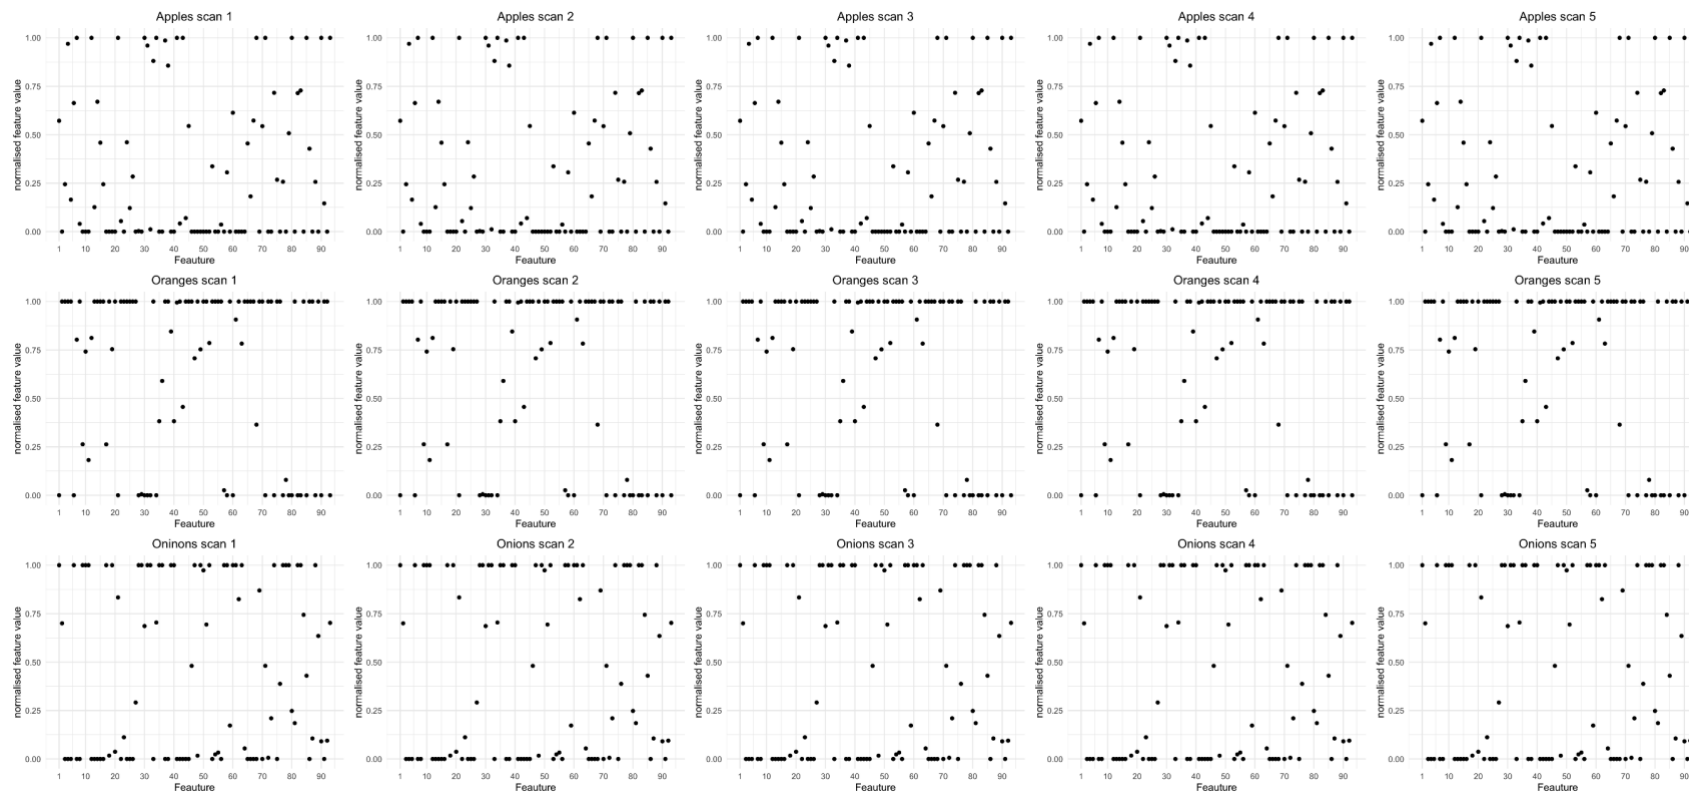

**Suppl. Figure 2:** Scatter plot of all 93 normalized radiomics features deviation compared to the related normalized radiomics features at 40 keV between -100 and 100 %.

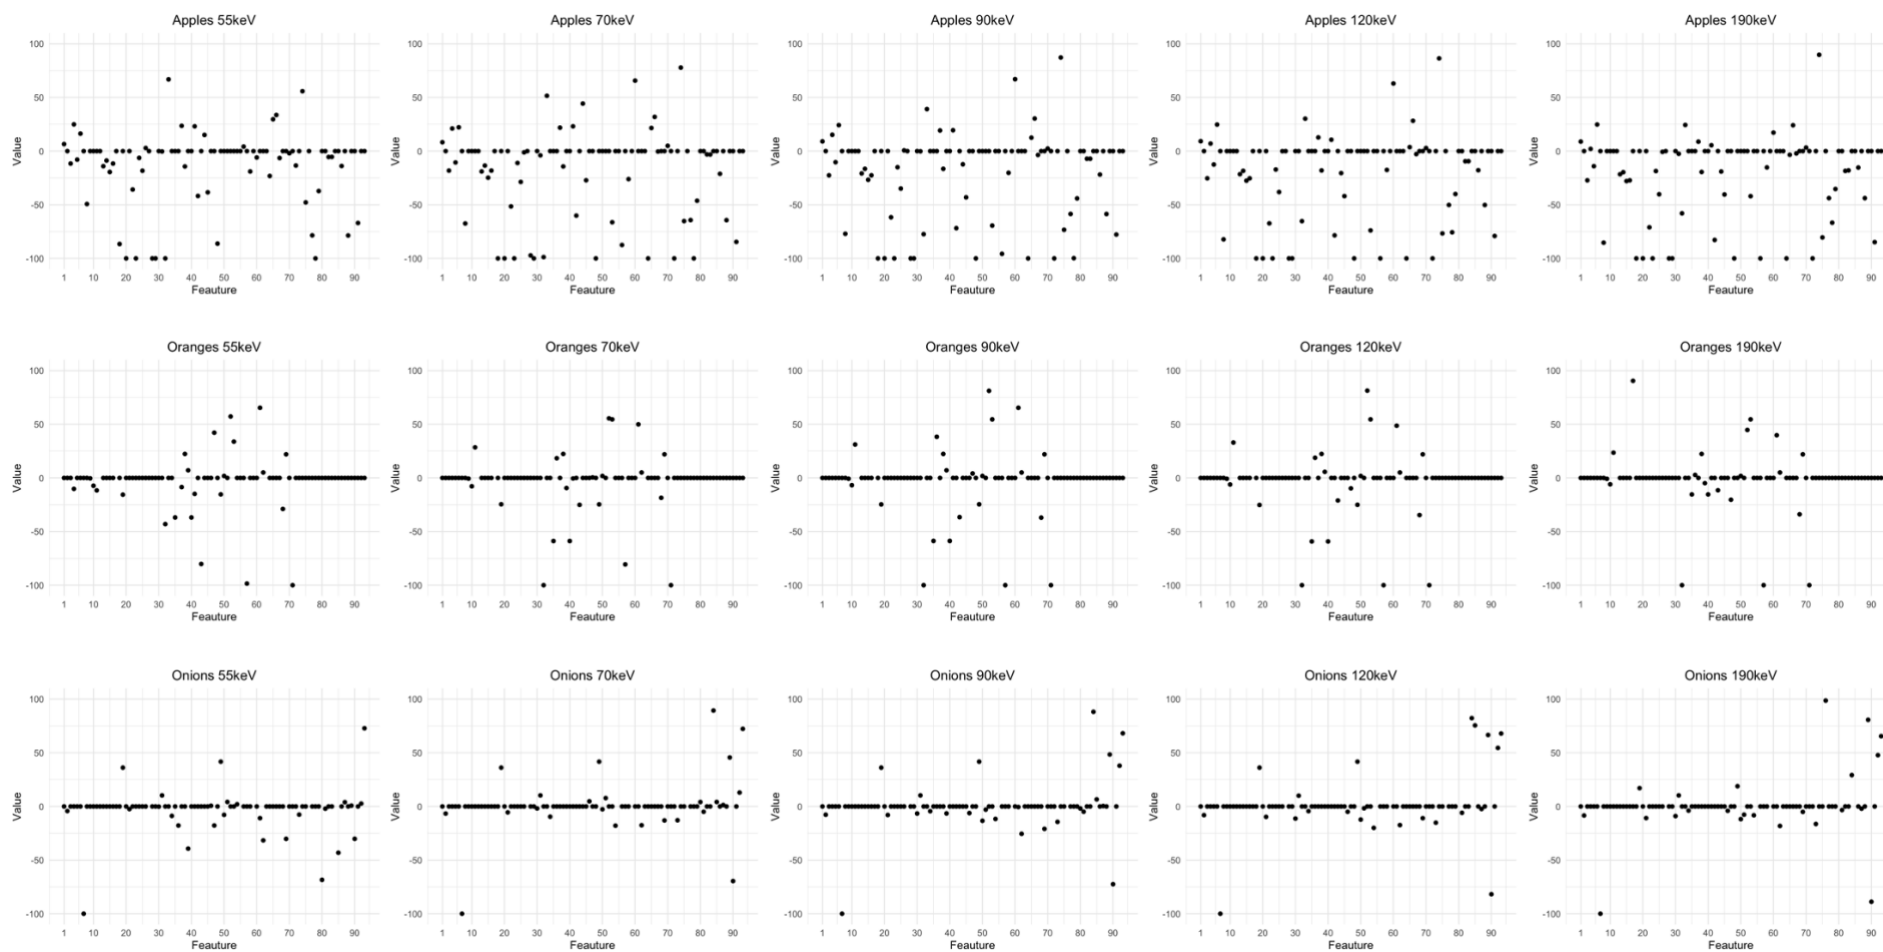

**Suppl. Table 1:** ICC of 12 previous described stable features between the different VMIs (40, 55, 70, 90, 120 and 190 keV)

| Apples                                 |                         |                         |                         |                         |                         |                         |                         |                         |                         |                         |                         |                         |                         |                         |              |
|----------------------------------------|-------------------------|-------------------------|-------------------------|-------------------------|-------------------------|-------------------------|-------------------------|-------------------------|-------------------------|-------------------------|-------------------------|-------------------------|-------------------------|-------------------------|--------------|
|                                        | 40 vs 55                | 40 vs 70                | 40 vs 90                | 40 vs 120               | 40 vs 190               | 55 vs 70                | 55 vs 90                | 55 vs 120               | 55 vs 190               | 70 vs 90                | 70 vs 120               | 70 vs 190               | 90 vs 120               | 90 vs 190               | 120 vs 190   |
| firstorder_Entropy                     | <b>0.77</b><br><b>8</b> | 0.55<br>5               | 0.38<br>3               | 0.36<br>8               | 0.32<br>8               | <b>0.94</b><br><b>4</b> | <b>0.86</b><br><b>6</b> | <b>0.83</b><br><b>5</b> | <b>0.81</b><br><b>0</b> | <b>0.98</b><br><b>3</b> | <b>0.96</b><br><b>7</b> | <b>0.95</b><br><b>4</b> | <b>0.99</b><br><b>7</b> | <b>0.99</b><br><b>2</b> | <b>0.999</b> |
| glcm_Differenceentropy                 | <b>0.98</b><br><b>9</b> | <b>0.97</b><br><b>9</b> | <b>0.96</b><br><b>8</b> | <b>0.96</b><br><b>7</b> | <b>0.96</b><br><b>1</b> | <b>0.99</b><br><b>6</b> | <b>0.98</b><br><b>9</b> | <b>0.98</b><br><b>4</b> | <b>0.97</b><br><b>7</b> | <b>0.99</b><br><b>7</b> | <b>0.99</b><br><b>4</b> | <b>0.99</b><br><b>0</b> | <b>0.99</b><br><b>9</b> | <b>0.99</b><br><b>6</b> | <b>0.999</b> |
| glcm_Jointentropy                      | <b>0.78</b><br><b>1</b> | 0.61<br>0               | 0.50<br>6               | 0.49<br>5               | 0.45<br>6               | <b>0.94</b><br><b>8</b> | <b>0.87</b><br><b>7</b> | <b>0.84</b><br><b>1</b> | <b>0.80</b><br><b>6</b> | <b>0.98</b><br><b>2</b> | <b>0.96</b><br><b>2</b> | <b>0.94</b><br><b>2</b> | <b>0.99</b><br><b>6</b> | <b>0.98</b><br><b>7</b> | <b>0.998</b> |
| gldm_DependenceEntropy                 | <b>0.79</b><br><b>5</b> | 0.29<br>0               | /                       | /                       | /                       | 0.65<br>3               | 0.13<br>3               | /                       | 0.19<br>1               | <b>0.93</b><br><b>0</b> | <b>0.89</b><br><b>0</b> | <b>0.92</b><br><b>3</b> | <b>0.98</b><br><b>6</b> | <b>0.98</b><br><b>5</b> | <b>0.992</b> |
| gldm_DependenceNonUniformity           | <b>0.92</b><br><b>6</b> | 0.46<br>7               | 0.23<br>5               | /                       | /                       | 0.48<br>4               | 0.11<br>5               | /                       | /                       | 0.39<br>9               | 0.08<br>4               | 0.16<br>4               | <b>0.92</b><br><b>7</b> | <b>0.97</b><br><b>2</b> | <b>0.986</b> |
| gldm_DependenceNonUniformityNormalized | <b>0.86</b><br><b>2</b> | /                       | /                       | /                       | /                       | /                       | /                       | /                       | /                       | /                       | /                       | /                       | <b>0.91</b><br><b>5</b> | <b>0.96</b><br><b>5</b> | <b>0.984</b> |
| gldm_GrayLevelNonUniformity            | 0.74<br>0               | 0.22<br>5               | /                       | /                       | /                       | 0.83<br>8               | 0.58<br>1               | 0.48<br>5               | 0.40<br>6               | <b>0.94</b><br><b>9</b> | <b>0.91</b><br><b>1</b> | <b>0.87</b><br><b>8</b> | <b>0.99</b><br><b>3</b> | <b>0.98</b><br><b>3</b> | <b>0.997</b> |
| glrlm_GrayLevelNonUniformity           | 0.73<br>3               | 0.22<br>3               | /                       | /                       | /                       | 0.73<br>7               | 0.39<br>3               | 0.27<br>9               | 0.26<br>4               | <b>0.93</b><br><b>7</b> | <b>0.88</b><br><b>8</b> | <b>0.87</b><br><b>0</b> | <b>0.98</b><br><b>8</b> | <b>0.97</b><br><b>8</b> | <b>0.998</b> |

|                                        |                         |                         |                         |                         |                         |                         |                         |                         |                         |                         |                         |                         |                         |                         |               |
|----------------------------------------|-------------------------|-------------------------|-------------------------|-------------------------|-------------------------|-------------------------|-------------------------|-------------------------|-------------------------|-------------------------|-------------------------|-------------------------|-------------------------|-------------------------|---------------|
| glrlm_RunLengthNonUniformity           | <b>0.91</b><br><b>8</b> | 0.69<br>5               | 0.50<br>0               | 0.21<br>0               | 0.43<br>7               | <b>0.91</b><br><b>9</b> | <b>0.76</b><br><b>8</b> | 0.60<br>7               | <b>0.75</b><br><b>1</b> | <b>0.90</b><br><b>7</b> | <b>0.83</b><br><b>5</b> | <b>0.90</b><br><b>7</b> | <b>0.98</b><br><b>6</b> | <b>0.99</b><br><b>3</b> | <b>0.981</b>  |
| glrlm_RunLengthNonUniformityNormalized | <b>0.78</b><br><b>2</b> | 0.32<br>1               | /                       | /                       | /                       | 0.65<br>3               | 0.17<br>9               | /                       | 0.06<br>5               | <b>0.87</b><br><b>9</b> | <b>0.75</b><br><b>6</b> | <b>0.85</b><br><b>0</b> | <b>0.97</b><br><b>7</b> | <b>0.99</b><br><b>0</b> | <b>0.977</b>  |
| glrlm_ShortRunEmphasis                 | 0.70<br>1               | 0.28<br>8               | /                       | /                       | /                       | 0.51<br>5               | /                       | /                       | /                       | <b>0.89</b><br><b>9</b> | <b>0.78</b><br><b>8</b> | <b>0.89</b><br><b>6</b> | <b>0.97</b><br><b>9</b> | <b>0.98</b><br><b>8</b> | <b>0.970</b>  |
| ngtdm_Coarseness                       | /                       | /                       | /                       | /                       | /                       | /                       | /                       | /                       | /                       | /                       | /                       | /                       | /                       | /                       | /             |
| <i>Total</i>                           | <i>0.75</i><br><i>0</i> | <i>0.42</i><br><i>3</i> | <i>0.43</i><br><i>2</i> | <i>0.40</i><br><i>8</i> | <i>0.43</i><br><i>6</i> | <i>0.69</i><br><i>9</i> | <i>0.49</i><br><i>0</i> | <i>0.57</i><br><i>6</i> | <i>0.47</i><br><i>4</i> | <i>0.80</i><br><i>6</i> | <i>0.73</i><br><i>4</i> | <i>0.76</i><br><i>1</i> | <i>0.89</i><br><i>5</i> | <i>0.90</i><br><i>2</i> | <i>0.907</i>  |
| Oranges                                |                         |                         |                         |                         |                         |                         |                         |                         |                         |                         |                         |                         |                         |                         |               |
|                                        | 40<br>vs<br>55          | 40<br>vs<br>70          | 40<br>vs<br>90          | 40<br>vs<br>120         | 40<br>vs<br>190         | 55<br>vs<br>70          | 55<br>vs<br>90          | 55<br>vs<br>120         | 55<br>vs<br>190         | 70<br>vs<br>90          | 70<br>vs<br>120         | 70<br>vs<br>190         | 90<br>vs<br>120         | 90<br>vs<br>190         | 120 vs<br>190 |
| firstorder_Entropy                     | 0.68<br>5               | <b>0.80</b><br><b>0</b> | 0.46<br>8               | <b>0.76</b><br><b>9</b> | <b>0.77</b><br><b>7</b> | <b>0.82</b><br><b>8</b> | 0.74<br>5               | 0.72<br>3               | <b>0.76</b><br><b>3</b> | <b>0.90</b><br><b>0</b> | <b>0.94</b><br><b>8</b> | <b>0.95</b><br><b>9</b> | <b>0.94</b><br><b>6</b> | <b>0.94</b><br><b>3</b> | <b>0.996</b>  |
| glcm_Differenceentropy                 | <b>0.96</b><br><b>5</b> | <b>0.98</b><br><b>9</b> | <b>0.81</b><br><b>2</b> | 0.74<br>5               | <b>0.83</b><br><b>0</b> | <b>0.96</b><br><b>5</b> | <b>0.90</b><br><b>2</b> | <b>0.85</b><br><b>3</b> | <b>0.91</b><br><b>1</b> | <b>0.86</b><br><b>9</b> | <b>0.80</b><br><b>9</b> | <b>0.88</b><br><b>4</b> | <b>0.99</b><br><b>4</b> | <b>0.98</b><br><b>8</b> | <b>0.975</b>  |
| glcm_Jointentropy                      | <b>0.80</b><br><b>2</b> | <b>0.83</b><br><b>7</b> | 0.36<br>1               | 0.65<br>0               | 0.70<br>9               | <b>0.80</b><br><b>7</b> | 0.66<br>9               | 0.67<br>2               | <b>0.78</b><br><b>6</b> | 0.61<br>7               | <b>0.85</b><br><b>5</b> | <b>0.93</b><br><b>9</b> | <b>0.92</b><br><b>4</b> | <b>0.87</b><br><b>7</b> | <b>0.963</b>  |
| gldm_DependenceEntropy                 | 0.71<br>2               | 0.34<br>7               | /                       | /                       | /                       | 0.13<br>1               | 0.55<br>3               | 0.52<br>3               | 0.61<br>7               | 0.35<br>7               | 0.51<br>1               | 0.62<br>3               | <b>0.98</b><br><b>2</b> | <b>0.95</b><br><b>6</b> | <b>0.990</b>  |
| gldm_DependenceNonUniformity           | <b>0.77</b><br><b>3</b> | 0.55<br>6               | 0.48<br>8               | 0.49<br>6               | 0.53<br>6               | 0.42<br>0               | 0.62<br>3               | 0.61<br>1               | 0.65<br>3               | <b>0.81</b><br><b>0</b> | <b>0.78</b><br><b>5</b> | <b>0.82</b><br><b>3</b> | <b>0.99</b><br><b>8</b> | <b>0.99</b><br><b>7</b> | <b>0.997</b>  |

|                                        |              |              |              |              |              |              |              |              |              |              |              |              |              |              |              |
|----------------------------------------|--------------|--------------|--------------|--------------|--------------|--------------|--------------|--------------|--------------|--------------|--------------|--------------|--------------|--------------|--------------|
| gldm_DependenceNonUniformityNormalized | 0.658        | 0.315        | 0.316        | 0.328        | 0.370        | 0.125        | 0.498        | 0.479        | 0.529        | <b>0.759</b> | 0.725        | <b>0.772</b> | <b>0.997</b> | <b>0.997</b> | <b>0.996</b> |
| gldm_GrayLevelNonUniformity            | /            | 0.076        | /            | 0.416        | 0.688        | 0.056        | <b>0.769</b> | 0.163        | /            | /            | /            | 0.399        | 0.335        | /            | <b>0.901</b> |
| glrlm_GrayLevelNonUniformity           | 0.221        | /            | 0.322        | 0.303        | 0.310        | /            | 0.136        | 0.040        | 0.059        | 0.740        | 0.723        | <b>0.835</b> | <b>0.996</b> | <b>0.988</b> | <b>0.983</b> |
| glrlm_RunLengthNonUniformity           | <b>0.925</b> | <b>0.886</b> | <b>0.896</b> | <b>0.956</b> | <b>0.982</b> | <b>0.822</b> | <b>0.855</b> | <b>0.878</b> | <b>0.927</b> | <b>0.991</b> | <b>0.974</b> | <b>0.949</b> | <b>0.985</b> | <b>0.964</b> | <b>0.992</b> |
| glrlm_RunLengthNonUniformityNormalized | <b>0.783</b> | /            | 0.007        | 0.214        | 0.256        | /            | 0.063        | 0.131        | 0.221        | <b>0.883</b> | <b>0.761</b> | <b>0.773</b> | <b>0.981</b> | <b>0.975</b> | <b>0.989</b> |
| glrlm_ShortRunEmphasis                 | <b>0.810</b> | /            | 0.073        | 0.296        | 0.351        | /            | 0.114        | 0.202        | 0.297        | <b>0.887</b> | <b>0.772</b> | <b>0.770</b> | <b>0.982</b> | <b>0.974</b> | <b>0.992</b> |
| ngtdm_Coarseness                       | /            | /            | /            | /            | /            | /            | /            | /            | /            | /            | /            | /            | /            | /            | /            |
| Total                                  | 0.667        | 0.534        | 0.374        | 0.470        | 0.528        | 0.462        | 0.494        | 0.440        | 0.524        | 0.710        | 0.715        | 0.727        | 0.843        | 0.878        | 0.898        |
| Onions                                 |              |              |              |              |              |              |              |              |              |              |              |              |              |              |              |
|                                        | 40 vs 55     | 40 vs 70     | 40 vs 90     | 40 vs 120    | 40 vs 190    | 55 vs 70     | 55 vs 90     | 55 vs 120    | 55 vs 190    | 70 vs 90     | 70 vs 120    | 70 vs 190    | 90 vs 120    | 90 vs 190    | 120 vs 190   |
| firstorder_Entropy                     | <b>0.896</b> | <b>0.906</b> | <b>0.914</b> | 0.353        | /            | <b>0.963</b> | <b>0.796</b> | 0.348        | /            | <b>0.901</b> | 0.551        | /            | <b>0.743</b> | /            | <b>0.767</b> |
| glcm_Differenceentropy                 | <b>0.998</b> | <b>0.996</b> | <b>0.995</b> | <b>0.989</b> | <b>0.989</b> | <b>0.999</b> | <b>0.997</b> | <b>0.991</b> | <b>0.991</b> | <b>0.998</b> | <b>0.996</b> | <b>0.996</b> | <b>0.997</b> | <b>0.997</b> | <b>1.000</b> |

|                                        |                  |                  |                  |           |                  |                  |                  |                  |                  |                  |                  |                  |                  |                  |              |
|----------------------------------------|------------------|------------------|------------------|-----------|------------------|------------------|------------------|------------------|------------------|------------------|------------------|------------------|------------------|------------------|--------------|
| glcm_Jointentropy                      | <b>0.78</b><br>5 | <b>0.81</b><br>1 | <b>0.92</b><br>7 | 0.66<br>7 | 0.15<br>8        | <b>0.96</b><br>1 | <b>0.82</b><br>7 | 0.43<br>4        | /                | <b>0.91</b><br>3 | 0.65<br>4        | /                | <b>0.76</b><br>5 | /                | <b>0.817</b> |
| gldm_DependenceEntropy                 | 0.68<br>5        | <b>0.83</b><br>0 | <b>0.82</b><br>2 | 0.71<br>3 | 0.28<br>6        | <b>0.94</b><br>0 | 0.67<br>3        | 0.29<br>8        | /                | <b>0.85</b><br>8 | 0.58<br>5        | /                | <b>0.79</b><br>2 | 0.01<br>2        | <b>0.803</b> |
| gldm_DependenceNonUniformity           | <b>0.85</b><br>1 | /                | 0.43<br>1        | 0.54<br>0 | /                | /                | <b>0.86</b><br>4 | <b>0.85</b><br>6 | /                | 0.66<br>6        | /                | <b>0.78</b><br>7 | <b>0.85</b><br>8 | 0.45<br>3        | /            |
| gldm_DependenceNonUniformityNormalized | <b>0.89</b><br>7 | /                | 0.58<br>7        | 0.73<br>0 | /                | /                | <b>0.86</b><br>8 | <b>0.89</b><br>9 | 0.06<br>1        | /                | /                | /                | <b>0.84</b><br>6 | /                | 0.302        |
| gldm_GrayLevelNonUniformity            | 0.54<br>0        | 0.59<br>1        | 0.24<br>4        | 0.28<br>5 | 0.22<br>7        | 0.16<br>1        | /                | /                | /                | <b>0.75</b><br>0 | 0.74<br>0        | 0.67<br>3        | <b>0.99</b><br>6 | <b>0.98</b><br>4 | <b>0.993</b> |
| glrlm_GrayLevelNonUniformity           | 0.39<br>6        | 0.30<br>0        | /                | /         | <b>0.85</b><br>8 | /                | /                | /                | /                | /                | /                | /                | <b>0.76</b><br>2 | <b>0.59</b><br>9 | <b>0.958</b> |
| glrlm_RunLengthNonUniformity           | <b>0.90</b><br>2 | <b>0.95</b><br>3 | <b>0.85</b><br>2 | 0.69<br>4 | 0.59<br>5        | <b>0.93</b><br>8 | <b>0.99</b><br>2 | <b>0.92</b><br>5 | <b>0.91</b><br>9 | <b>0.93</b><br>0 | <b>0.87</b><br>6 | <b>0.78</b><br>4 | <b>0.96</b><br>7 | <b>0.95</b><br>8 | <b>0.976</b> |
| glrlm_RunLengthNonUniformityNormalized | 0.73<br>6        | <b>0.88</b><br>6 | <b>0.77</b><br>7 | 0.00<br>3 | /                | <b>0.85</b><br>0 | <b>0.94</b><br>9 | 0.61<br>1        | <b>0.81</b><br>7 | <b>0.90</b><br>6 | 0.47<br>3        | 0.54<br>6        | <b>0.77</b><br>5 | <b>0.86</b><br>0 | <b>0.912</b> |
| glrlm_ShortRunEmphasis                 | <b>0.76</b><br>5 | <b>0.90</b><br>9 | <b>0.76</b><br>7 | /         | 0.15<br>0        | <b>0.87</b><br>6 | <b>0.95</b><br>3 | 0.64<br>7        | <b>0.85</b><br>3 | <b>0.91</b><br>0 | 0.48<br>5        | 0.64<br>7        | <b>0.80</b><br>0 | <b>0.90</b><br>0 | <b>0.928</b> |
| ngtdm_Coarseness                       | /                | /                | /                | /         | /                | /                | /                | /                | /                | /                | /                | /                | /                | /                | /            |
| Total                                  | 0.70<br>4        | 0.71<br>8        | 0.66<br>5        | 0.49<br>7 | 0.40<br>8        | 0.74<br>3        | 0.79<br>2        | 0.60<br>1        | 0.60<br>7        | 0.78<br>3        | 0.59<br>6        | 0.63<br>3        | 0.77<br>5        | 0.64<br>0        | 0.769        |

Bold type = ICC >0,75; / = ICC could not be calculated due to negative covariance of factors
